# Supplementary material for: Long‐read nanopore DNA sequencing can resolve complex intragenic duplication/deletion variants, providing information to enable preimplantation genetic diagnosis
Source: PubMed Central journal article supplement (PMC9305782; doi:10.1002/pd.6089), 2022-01-18
Supplement: PD-42-226-s004.pdf [file PD-42-226-s004.pdf]

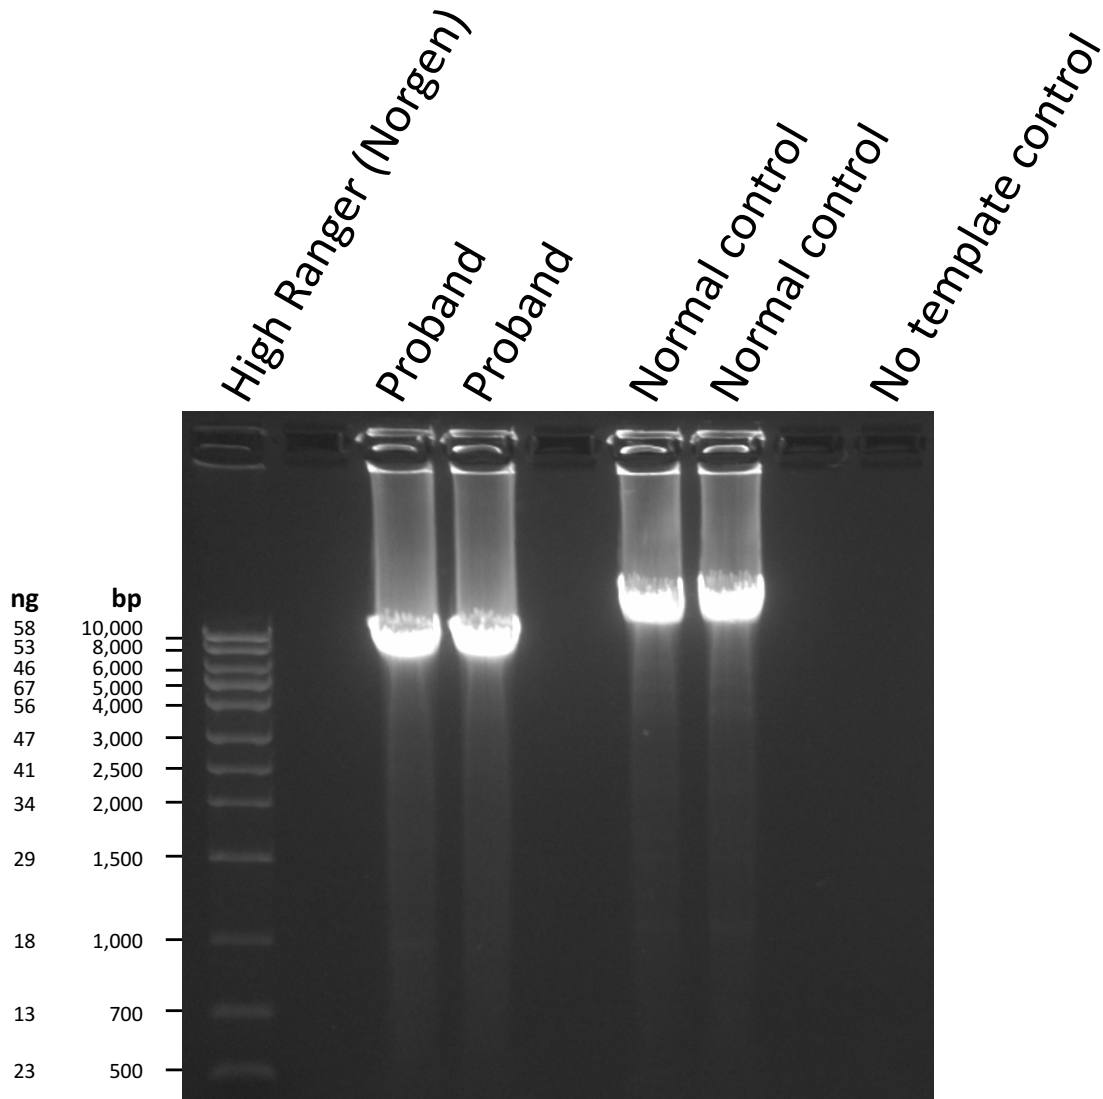

**Supplementary Figure 1:** Long-range PCR amplification products showing preferential amplification of the variant-containing allele. Bands were gel excised prior to QIAquick column purification and nanopore sequencing.
