# Supplementary material for: Long‐read nanopore DNA sequencing can resolve complex intragenic duplication/deletion variants, providing information to enable preimplantation genetic diagnosis
Source: PubMed Central journal article supplement (PMC9305782; doi:10.1002/pd.6089), 2022-01-18
Supplement: PD-42-226-s005.pdf [file PD-42-226-s005.pdf]

| Mismatch location | Mismatch defined following pairwise comparison of Canu assembled reads to the human reference genome (hg19) | Proportion of each nucleotide at SNV sites (determined from aligned nanopore reads)                    | Sanger sequencing validation                                                                                                                                                                                               | Final result                                                                                            |
|-------------------|-------------------------------------------------------------------------------------------------------------|--------------------------------------------------------------------------------------------------------|----------------------------------------------------------------------------------------------------------------------------------------------------------------------------------------------------------------------------|---------------------------------------------------------------------------------------------------------|
| 1                 | Deletion of 10 "T" nts from a 24 nt poly(T) tract                                                           |                                                                                                        |                                                                                                                                                                                                                            | Sanger sequencing failed; variant unconfirmed                                                           |
| 2                 | SNV                                                                                                         | Chr13:49,043,803<br>T: 1208 (95%)<br>A: 18 (1%)<br>C: 39 (3%) Ref<br>G: 4 (0%)<br>Total: 1269 (100%)   | Reference: TCTAGAAAACCCCATCTCTCAGCCCAAAT<br>Assembly: TCTAGAAAACCCCATCTCTCAGCCCAAAT<br>Sanger: TCTAGAAAACCCCATCTCTCAGCCCAAAT<br>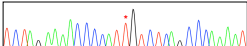         | SNV confirmed                                                                                           |
| 3                 | SNV                                                                                                         | Chr13:49,043,835<br>T: 6 (0%)<br>A: 1193 (95.0%)<br>C: 4 (0%)<br>G: 54 (4%) Ref<br>Total: 1257 (100%)  | Reference: TCCTTAGCTGATTAACCACTTACGCAAAAT<br>Assembly: TCCTTAGCTGATTAACCACTTACGCAAAAT<br>Sanger: TCCTTAGCTGATTAACCACTTACGCAAAAT<br>      | SNV confirmed                                                                                           |
| 4                 | SNV                                                                                                         | Chr13:49,044,143<br>T: 5 (0%)<br>A: 1211 (97%)<br>C: 8 (1%)<br>G: 23 (2%) Ref<br>Total: 1247 (100%)    | Reference: GTAATTTACAGATTGATGCCATCCCCATCA<br>Assembly: GTAATTTACAGATTGATGCCATCCCCATCA<br>Sanger: GTAATTTACAGATTGATGCCATCCCCATCA<br>      | SNV confirmed                                                                                           |
| 5                 | SNV                                                                                                         | Chr13:49,044,819<br>T: 5 (0%)<br>A: 44 (4%)<br>C: 59 (5%) Ref<br>G: 1081 (91%)<br>Total: 1189 (100%)   | Reference: ACAAAAGGCTAATATCCAGAATCTACAATGA<br>Assembly: ACAAAAGGCTAATATCCAGAATCTACAATGA<br>Sanger: ACAAAAGGCTAATATCCAGAATCTACAATGA<br>   | SNV confirmed                                                                                           |
| 6                 | Insertion of "AAC" into a 7 nt poly(A) tract                                                                |                                                                                                        | Reference: AATTTACAGAAAAACAACCCATCAAAA<br>Assembly: AATTTACAGAAAAACAACCCATCAAAA<br>Sanger: AATTTACAGAAAAACAACCCATCAAAA<br>               | Poly(A) tract length undercalled by a single "A" nucleotide. Inserted non-ref "C" correctly identified. |
| 7                 | SNV                                                                                                         | Chr13:49,044,867<br>T: 189 (16%) Ref<br>A: 2 (0%)<br>C: 1020 (84%)<br>G: 8 (1%)<br>Total: 1219 (100%)  | Reference: AGAAAAACAACCCATCAAAAAGTGGCG<br>Assembly: AAAAAACAACCCATCAAAAAGTGGCG<br>Sanger: AAAAAACAACCCATCAAAAAGTGGCG<br>                 | SNV confirmed                                                                                           |
| 8                 | SNV                                                                                                         | Chr13:49,045,543<br>T: 297 (25%) Ref<br>A: 30 (3%)<br>C: 818 (70%)<br>G: 30 (3%)<br>Total: 1175 (100%) | Reference: ACACCTCTGGGACTGCGGTGGGTGGGGGA<br>Assembly: ACACCTCTGGGACTGCGGTGGGTGGGGGA<br>Sanger: ACACCTCTGGGACTGCGGTGGGTGGGGGA<br>         | SNV confirmed                                                                                           |
| 9                 | Deletion of a single "G" nt from a 6 nt poly(G) tract                                                       |                                                                                                        | Reference: GGTCTGGGGAGGGGGAGGGATAGCATTGGG<br>Assembly: GGTCTGGGGAGGGGGAGGGATAGCATTGGG<br>Sanger: GGTCTGGGGAGGGGGAGGGATAGCATTGGG<br>      | Poly(G) tract length undercalled by a single "G" nucleotide                                             |
| 10                | Insertion of "TAAAAA" into a 14 nt poly(A) tract                                                            |                                                                                                        |                                                                                                                                                                                                                            | Sanger sequencing failed; variant unconfirmed                                                           |
| 11                | Deletion of a single "T" nt from a 7 nt poly(T) tract                                                       |                                                                                                        | Reference: TTCCTGTGGATTTTTTCCTTTGCTGTTA<br>Assembly: TTCCTGTGGATTTTTTCCTTTGCTGTTA<br>Sanger: TTCCTGTGGATTTTTTCCTTTGCTGTTA<br>          | Poly(T) tract length undercalled by a single "T" nucleotide                                             |
| 12                | Deletion of a single "G" nt from a 5 nt poly(G) tract                                                       |                                                                                                        | Reference: GGCAAGAAAAGGGGCGATAGTTGGCCTTTC<br>Assembly: GGCAAGAAAAGGGGCGATAGTTGGCCTTTC<br>Sanger: GGCAAGAAAAGGGGCGATAGTTGGCCTTTC<br>    | Poly(G) tract length undercalled by a single "G" nucleotide                                             |
| 13                | Deletion of a single "T" nt from an 8 nt poly(T) tract                                                      |                                                                                                        | Reference: ACTTAGGTAGTTTTTAAATAGTATAATT<br>Assembly: ACTTAGGTAGTTTTTAAATAGTATAATT<br>Sanger: ACTTAGGTAGTTTTTAAATAGTATAATT<br>          | Poly(T) tract length undercalled by a single "T" nucleotide                                             |
| 14                | Deletion of a single "A" nt from a 7 nt poly(A) tract                                                       |                                                                                                        | Reference: ATTGGAGGGCAAAAATCTCTATATCACT<br>Assembly: ATTGGAGGGCAAAAATCTCTATATCACT<br>Sanger: ATTGGAGGGCAAAAATCTCTATATCACT<br>          | Poly(A) tract length undercalled by a single "A" nucleotide                                             |
| 15                | Deletion of a single "C" nt from a 3 nt poly(C) tract                                                       |                                                                                                        | Reference: CCTTTGCCCTCCCTAAATATGGGCAATGGCA<br>Assembly: CCTTTGCCCTCCCTAAATATGGGCAATGGCA<br>Sanger: CCTTTGCCCTCCCTAAATATGGGCAATGGCA<br> | Poly(C) tract length undercalled by a single "C" nucleotide                                             |
| 16                | Deletion of a single "T" nt from a 7 nt poly(T) tract                                                       |                                                                                                        | Reference: ATGTGTGAGATTTTTTCTCACCCAAATCTA<br>Assembly: ATGTGTGAGATTTTTTCTCACCCAAATCTA<br>Sanger: ATGTGTGAGATTTTTTCTCACCCAAATCTA<br>    | Poly(T) tract length undercalled by a single "T" nucleotide                                             |
| 17                | Deletion of a single "G" nt from a 6 nt poly(G) tract                                                       |                                                                                                        | Reference: ATACGAATTTGGGGGTTCCGATAGTGCCTC<br>Assembly: ATACGAATTTGGGGGTTCCGATAGTGCCTC<br>Sanger: ATACGAATTTGGGGGTTCCGATAGTGCCTC<br>    | Poly(G) tract length undercalled by a single "G" nucleotide                                             |
| 18                | Deletion of a single "C" nt from a 5 nt poly(C) tract                                                       |                                                                                                        | Reference: CAATTTCCAAACCCCTCCCTCCCTGGATAG<br>Assembly: CAATTTCCAAACCCCTCCCTCCCTGGATAG<br>Sanger: CAATTTCCAAACCCCTCCCTCCCTGGATAG<br>    | Poly(C) tract length undercalled by a single "C" nucleotide                                             |
| 19                | SNV                                                                                                         | Chr13:49,048,628<br>T: 39 (3%)<br>A: 24 (2%)<br>C: 58 (5%) Ref<br>G: 1146 (90%)<br>Total: 1267 (100%)  | Reference: FAACCTCACAGGAATCTTTATAAAACAATTT<br>Assembly: FAACCTCACAGGAATCTTTATAAAACAATTT<br>Sanger: FAACCTCACAGGAATCTTTATAAAACAATTT<br> | SNV confirmed                                                                                           |
| 20                | SNV                                                                                                         | Chr13:49,048,757<br>T: 76 (8%)<br>A: 10 (1%)<br>C: 92 (9%) Ref<br>G: 828 (82%)<br>Total: 1006 (100%)   | Reference: TTCATACATATGACATTTTTGCTTGCCTT<br>Assembly: TTCATACATATGACATTTTTGCTTGCCTT<br>Sanger: TTCATACATATGACATTTTTGCTTGCCTT<br>       | SNV confirmed                                                                                           |
| 21                | SNV                                                                                                         | Chr13:49,049,232<br>T: 945 (83%)<br>A: 19 (2%)<br>C: 170 (15%) Ref<br>G: 8 (1%)<br>Total: 1142 (100%)  | Reference: CAGATTGGTATGAACTCCCTGGCTTCCACGA<br>Assembly: CAGATTGGTATGAACTCCCTGGCTTCCACGA<br>Sanger: CAGATTGGTATGAACTCCCTGGCTTCCACGA<br> | SNV confirmed                                                                                           |
| 22                | Deletion of "TGGGC"; not from within a poly(N) tract                                                        | Chr13:49,049,490_49,049,494<br>Deleted: 916 (71%)<br>Non-deleted: 381 (29%)                            | Reference: GATCAAGGTGTCAAGTGGGCTGGGCTGCAG<br>Assembly: GATCAAGGTGTCAAGTGGGCTGGGCTGCAG<br>Sanger: GATCAAGGTGTCAAGTGGGCTGGGCTGCAG<br>    | Deletion confirmed                                                                                      |
| 23                | Deletion of a single "C" nt from a 4 nt poly(C) tract                                                       |                                                                                                        | Reference: TCTTGCCTTTGGGCCCTCCATAGTACTGCT<br>Assembly: TCTTGCCTTTGGGCCCTCCATAGTACTGCT<br>Sanger: TCTTGCCTTTGGGCCCTCCATAGTACTGCT<br>    | Poly(C) tract length undercalled by a single "C" nucleotide                                             |

Supplementary Figure 3: Sanger sequencing validation of mismatched nucleotides identified following pairwise alignment between the human reference sequence and Canu-generated consensus assembly. Mismatch locations correspond to the annotated sites in Supplementary Figure 2.
